# Supplementary material
Source: PubMed Central journal article supplement (PMC3579965)
Supplement: 11606_2012_2241_MOESM1_ESM.pdf [file 11606_2012_2241_MOESM1_ESM.pdf]

## Appendices

### Appendix 1: Overview of Health Literacy Studies

| Author(s), year Source         | Design          | Participants' characteristics<br>N, diabetes type, recruitment site [age, sex, race, educational level]                                                                                                                                                                                                                                                                                                                                                                               | HL measure (levels) / [domain addressed]                                                        | Outcomes                                                                                                  | Type of analysis performed                                | Covariates*:                                                                                                                                  | Main findings† †                                                                               | Quality Rating |
|--------------------------------|-----------------|---------------------------------------------------------------------------------------------------------------------------------------------------------------------------------------------------------------------------------------------------------------------------------------------------------------------------------------------------------------------------------------------------------------------------------------------------------------------------------------|-------------------------------------------------------------------------------------------------|-----------------------------------------------------------------------------------------------------------|-----------------------------------------------------------|-----------------------------------------------------------------------------------------------------------------------------------------------|------------------------------------------------------------------------------------------------|----------------|
| Aikens & Piette, 2009 USA (36) | Cross-sectional | 1376 patients with T2DM recruited from general medicine clinics [antihyperglycemic group: Mean age (SD): 55.3(11.8); 61.6% females; Race: 58.3% African American & 41.7% other races; years of education: 21.6% < 12 years; 35.7% = 12 years, & 42.7% > 12 years; antihyperglycemic + antihypertensive group: Mean age (SD): 57.2(10.7); 68.3% females; Race: 61.9% African American & 38.1% other races; years of education: 22.8% < 12 years; 36.6% = 12 years, & 40.6% > 12 years] | 3-brief* SQs (problem learning, needing help reading, not confident with forms) [Functional HL] | Medication beliefs (BMQ)                                                                                  | Spearman correlation, multiple linear regression analysis | Age, sex, race, income, number of medical conditions, number of prescribed medications, insulin use, satisfaction with medication information | HL was associated with concerns about medications harmfulness                                  | Good           |
| Arthur et al., 2009 USA (31)   | Cross-sectional | 31 patients with T2DM recruited from a primary care clinic in an urban public hospital [79.4% females; Race: 100% African American; Mean years of education (SD): 11.6 (2.3)]                                                                                                                                                                                                                                                                                                         | REALM<br>Categorical (2 levels: inadequate vs. marginal-adequate) [Functional HL]               | Patient-physician communication                                                                           | Chi-square difference test                                | None                                                                                                                                          | HL was associated with paternalistic interactions with care providers                          | Fair           |
| Bains & Egede, 2011 USA Ψ (13) | Cross-sectional | 125 patients with T2DM recruited from a primary care clinic [Age: 50.7% were under 65 years old & 49.3% 65 years and above; 72.5% females, Race: 71.4% black & 28.6% white; Education: 68.2% ≤ high school & 31.8% > high school]                                                                                                                                                                                                                                                     | REALM-R<br>Continuous [Functional HL]                                                           | Glycemic control (A1c), diabetes knowledge (DKQ), self-care (SDSCA), medication adherence (Morisky score) | Spearman correlation<br>Multiple linear regression        | Age, sex, race, educational level, income, health status                                                                                      | HL was associated with diabetes knowledge, but not with A1c, self-care or medication adherence | Good           |

|                                      |                 |                                                                                                                                                                                                                                                                                                                                                    |                                                                                                     |                                                                                                                                                     |                                                                          |                                                                                                                          |                                                                                                                                      |           |
|--------------------------------------|-----------------|----------------------------------------------------------------------------------------------------------------------------------------------------------------------------------------------------------------------------------------------------------------------------------------------------------------------------------------------------|-----------------------------------------------------------------------------------------------------|-----------------------------------------------------------------------------------------------------------------------------------------------------|--------------------------------------------------------------------------|--------------------------------------------------------------------------------------------------------------------------|--------------------------------------------------------------------------------------------------------------------------------------|-----------|
| DeWalt et al., 2007<br>USA (28)      | Cross-sectional | 268 patients with T2DM recruited from general internal medicine clinics [High HL group: Mean age (SD): 58 (11); 69% females; Race: 48% African American, 49% white; Mean education years (SD): 12(3); Low HL group: Mean age (SD): 62 (10); 57% females; Race: 74% African American, 25% white, & 1% other races; Mean education years (SD): 8(3)] | REALM<br>Categorical (2 levels: low vs. high)<br>Continuous<br>[Functional HL]                      | Glycemic control (A1c), health-related quality of life, trust (WFPTS), self-efficacy (DMSES), involvement in decision making (DPMD, FPI), knowledge | Pairwise correlation                                                     | None                                                                                                                     | HL was associated with self-efficacy, and involvement in decision making, but not with A1c, health-related quality of life, or trust | Fair-good |
| Gazmararian et al., 2003<br>USA (21) | Cross-sectional | 266 patients with T1DM or T2DM recruited from a national managed care organization [NR]                                                                                                                                                                                                                                                            | s-TOFHLA<br>Categorical (3 levels: inadequate, marginal, adequate)<br>Continuous<br>[Functional HL] | Diabetes knowledge (11 questions)                                                                                                                   | Multiple linear regression                                               | Age, diabetes duration, attended a diabetes class, education, cognitive health, physical functioning, mental functioning | HL was associated with diabetes knowledge                                                                                            | Fair-good |
| Gerber et al. 2006<br>USA (22)       | Cross-sectional | 255 patients with T1DM or T2DM recruited from 5 community-based clinics [Mean age (SD): 55.2(12.3); 65.9% females; Race: 30.2% African-American, 64.7% Hispanic, 3.1% Caucasian, & 2% other races; Education: 45% < high school, 34.5% some or completed high school, & 20.4% > high school]                                                       | s-TOFHLA<br>Categorical (3 levels: inadequate, marginal, adequate)<br>[Functional HL]               | Diabetes knowledge (KDQ), self-efficacy                                                                                                             | Partial correlation                                                      | Age, diabetes duration, treatment regimen                                                                                | HL was associated with knowledge, but not with self efficacy                                                                         | Good      |
| Ishikawa & Yano, 2011<br>Japan (18)  | Cross-sectional | 143 patients with T2DM recruited from a university hospital [Mean age (SD): 65(9.1); 42.7% females; Education: 23.8% middle school, 48.9% high school, 13.3% vocational school, 14% university or higher]                                                                                                                                          | Self-rated HL scale**:<br>Communicative HL-subscale<br>[Interactive HL]                             | Glycemic control (A1c), self-efficacy                                                                                                               | Pearson correlation<br>Multiple linear regression<br>Logistic regression | Age, sex, education, duration of diabetes, A1c, and visit length                                                         | Communicative HL was associated with self-efficacy and with A1c                                                                      | Good      |
| Ishikawa et al., 2009<br>Japan (32)  | Cross-sectional | 134 patients with T2DM recruited from a university hospital [Mean age (SD): 65(9); 44% females; Education: 23.9% middle school, 48.5% high school, 14.2% vocational school, 13.4% university or higher]                                                                                                                                            | Self-rated HL scale, 3 subscales**<br>[Functional HL, Interactive HL, Critical HL]                  | Patient-physician information exchange (RIAS)                                                                                                       | Logistic regression                                                      | Age, sex, education, duration of diabetes, A1c, visit length                                                             | Functional HL was associated with asking close-ended questions & information giving; Critical HL was associated                      | Good      |

|                                                          |                 |                                                                                                                                                                                                                                                                                                                                      |                                                                                                    |                                                                                                        |                                                    |                                                                                    |                                                                                                                                   |           |
|----------------------------------------------------------|-----------------|--------------------------------------------------------------------------------------------------------------------------------------------------------------------------------------------------------------------------------------------------------------------------------------------------------------------------------------|----------------------------------------------------------------------------------------------------|--------------------------------------------------------------------------------------------------------|----------------------------------------------------|------------------------------------------------------------------------------------|-----------------------------------------------------------------------------------------------------------------------------------|-----------|
|                                                          |                 |                                                                                                                                                                                                                                                                                                                                      |                                                                                                    |                                                                                                        |                                                    |                                                                                    | with psychosocial information giving; communicative HL was associated with counseling, and perception of physician's explanation. |           |
| Ishikawa et al., 2008<br>Japan <a href="#">W</a><br>(25) | Cross-sectional | 138 patients with T2DM recruited from outpatient family medicine clinics [Mean age (SD): 65(9.9); 47.1% females; Education: 21.7% middle school, 43.5% high school, 13.8% vocational school, 12.3% university or higher]                                                                                                             | Self-rated HL scale, 3 subscales**<br>[Functional HL, Interactive HL, Critical HL]                 | Glycemic control (A1c), self efficacy, diabetes knowledge                                              | Spearman correlation                               | None                                                                               | HL was associated with diabetes knowledge and self efficacy, but not with A1c                                                     | Fair-good |
| Kim et al. 2004<br>USA (23)                              | Longitudinal    | 92 patients with T1DM or T2DM, recruited from diabetes education classes at a hospital [High HL group: mean age = 58.2 years; 58.6% females; Race: 36.2% white, 60% black, & 2.9% other; Mean education years = 14. Low HL group: mean age = 67.2; 81% females; Race: 20% white, 75% black, & 5% other; Mean education years = 10.2] | s-TOFHLA<br>Categorical (2 levels: adequate vs. limited)<br>[Functional HL]                        | Glycemic control (A1c), Self-care (SDSCA), diabetes Knowledge (DKQ)                                    | Paired t-test, ANCOVA                              | Age, years of education, income                                                    | HL was associated with diabetes knowledge, but not with A1c or self-care                                                          | Good      |
| Laramee et al., 2007<br>USA (35)                         | Cross-sectional | 998 patients with T1DM or T2DM recruited from family medicine and general internal medicine clinics [Mean age (range): 65(22-93); 54% females; Race: 97% white & 3% other races; Education: 75% high school graduate & 25% other educational level]                                                                                  | s-TOFHLA<br>Continuous<br>[Functional HL]                                                          | Heart failure                                                                                          | Logistic regression                                | Age, sex, race, income, marital status, health insurance                           | HL was not associated with heart failure                                                                                          | Good      |
| Lyles et al., 2011<br>USA <a href="#">W</a><br>(37)      | Cross-sectional | 17,795 patients with T1DM or T2DM from Kaiser Permanente Northern California [Age: 21% < 50 years, 50% 50-64 years, 29% ≥ 65 years; 49% females; Race: 20% Black, 23% Latino, 27% White, 13% Asian, 11% Filipino, 7% other races; Education: 46% ≤ high school, 24% some college, 29% ≥ college]                                     | 3-brief* SQs (problem learning, needing help reading, not confident with forms)<br>[Functional HL] | Healthcare and general discrimination                                                                  | Logistic regression                                | Age, sex, race, educational level, income, English proficiency                     | HL was associated with healthcare and general discrimination                                                                      | Good      |
| Mancuso, 2010<br>USA (14)                                | Cross-sectional | 102 patients with T1DM or T2DM recruited from two urban primary care clinics [Mean age (SD): 52(9.1); 60.8% females; Race: 12.7% non-Hispanic Caucasian, 79.4% non-Hispanic Black/African American, 5.9% Hispanic/Latino American, 2% other races; Education: 70.6% ≤                                                                | TOFHLA<br>Continuous<br>[Functional HL]                                                            | Glycemic control (A1c), diabetes knowledge (DKT), self-care (SDSCA), depression (CES-D), patient trust | Spearman correlation<br>Multiple linear regression | Patient trust, depression, diabetes knowledge, performance of self-care activities | HL was associated with diabetes knowledge, but not with A1c, self-care, or depression                                             | Good      |

|                                |                 |                                                                                                                                                                                                                                                                                                                                             |                                                                                                    |                                                                                          |                                                 |                                                                                                                                      |                                                                                                                                                          |           |
|--------------------------------|-----------------|---------------------------------------------------------------------------------------------------------------------------------------------------------------------------------------------------------------------------------------------------------------------------------------------------------------------------------------------|----------------------------------------------------------------------------------------------------|------------------------------------------------------------------------------------------|-------------------------------------------------|--------------------------------------------------------------------------------------------------------------------------------------|----------------------------------------------------------------------------------------------------------------------------------------------------------|-----------|
| Mbaezue et al., 2010 USA (29)  | Cross-sectional | high school, 29.4% > than high school]<br>189 patients with T1DM or T2DM recruited from one large hospital-based clinic [Mean age (SD): 51.2 (10); 58.7% females; Race: 94.7% African American & 5.3% white; Education: 32.3% <high school; 33.9% high school graduate & 33.9% some college]                                                | s-TOFHLA<br>Categorical (2 levels: inadequate vs. adequate)<br>[Functional HL]                     | (HCR Trust Scale)<br>SMBG (Diabetes Care Profile)                                        | Logistic regression                             | Age, education, insurance status, diabetes duration                                                                                  | symptoms<br>HL was not associated with SBMG                                                                                                              | Good      |
| McCleary-Jones, 2011 USA (24)  | Cross-sectional | 50 patients with T1DM or T2DM recruited from a community health center [Mean age (SD): 58.6 (11.5); 76% females; Education: 6%: 7-11 grade, 28%: HS/GED, 24% some college, 20% college grad, 22% grad degree]                                                                                                                               | REALM<br>Continuous<br>[Functional]                                                                | Diabetes knowledge (DKT), self-care (SDSCA)                                              | Pearson correlation                             | None                                                                                                                                 | HL was associated with diabetes knowledge, but not with self-efficacy<br>HL was not associated with self-care                                            | Fair-good |
| Morris et al., 2006 USA (20)   | Cross-sectional | 1002 patients with T1DM or T2DM recruited from the Vermont Diabetes Information System [Median age (IQR): 66 (57-74); 54% females; Race: 97% white; Education: 25% ≤ high school, 36% high school, 31% some college or graduated college, & 9% had graduate education]                                                                      | s-TOFHLA<br>Categorical (3 levels: inadequate, marginal, adequate) & continuous<br>[Functional HL] | Glycemic control (A1c), LDL, blood pressure, self-reported diabetes complications        | Multiple linear regression, logistic regression | Age, sex, race, marital status, insurance, income, duration of diabetes, diabetes education, depression, alcohol use, medication use | HL was not associated with A1c, LDL, blood pressure, or self-reported diabetes complications                                                             | Good      |
| Osborn et al., 2010 USA Ψ (39) | Cross-sectional | 130 patients with T2DM, recruited from an outpatient primary care clinic [Mean age (SD): 62.7 (11.8); 72.5% females; Race: 28.6% non-Hispanic white & 71.4% non-Hispanic black; Mean education years (SD): 12.4 (5.2)]                                                                                                                      | REALM-R<br>Categorical (2 levels: low vs. high)<br>[Functional HL]                                 | Glycemic control (A1c), self-care (SDSCA),                                               | SEM                                             | Diabetes Knowledge, diabetes fatalism, social support                                                                                | There was no direct association between HL and diabetes self-care or A1c. HL had an indirect effect on diabetes self-care and A1c through social support | Good      |
| Powell et al., 2007 USA (12)   | Cross-sectional | 68 patients with T2DM recruited from an academic general internal medicine clinic [Median age (IQR): 55 (51-60); 79.4% females; Race: 66.2% African American & 33.8% other races; Education: 4.4% < 4 <sup>th</sup> grade, 10.3% 4 <sup>th</sup> – 6 <sup>th</sup> grade, 13.2% 7 <sup>th</sup> – 8 <sup>th</sup> grade, 72.1% high school] | REALM<br>Categorical (4 levels)<br>[Functional HL]                                                 | Glycemic control (A1c), diabetes knowledge (DKT), diabetes-related health beliefs (DHBM) | one-way ANOVA<br>Multiple linear regression     | Age, race, educational level, treatment regimen                                                                                      | HL was associated with A1c and diabetes knowledge, but not with diabetes-related health beliefs                                                          | Good      |
| Rothman et al., 2004           | Longitudinal    | 217 patients with T2DM recruited from the US academic general internal medicine practice [Control group Low HL mean age = 59(10.4)]                                                                                                                                                                                                         | REALM<br>Categorical (2 levels: low vs.                                                            | Achievement of goal A1c levels                                                           | Logistic regression                             | Age, sex, race, income, insulin status at enrollment,                                                                                | HL was an effect modifier for reaching goal                                                                                                              | Good      |

|                                          |                 |                                                                                                                                                                                                                                                                                                                                                                                                                                   |                                                                                                    |                                                              |                                                                             |                                                                                                                                                   |                                                            |      |
|------------------------------------------|-----------------|-----------------------------------------------------------------------------------------------------------------------------------------------------------------------------------------------------------------------------------------------------------------------------------------------------------------------------------------------------------------------------------------------------------------------------------|----------------------------------------------------------------------------------------------------|--------------------------------------------------------------|-----------------------------------------------------------------------------|---------------------------------------------------------------------------------------------------------------------------------------------------|------------------------------------------------------------|------|
| USA (50)                                 |                 | years; 53% females; 68% African American; 82% < high school education. Control group High HL mean age = 56(10.9) years; 58% females; 55% African American; 26% < high school education. Intervention group Low HL mean age = 57(10.5) years; 55% females; 94% African American; 82% < high school education. Intervention group High HL mean age= 51(13.1) years; 65% females; 51% African American; 59% < high school education] | high)<br>[Functional HL]                                                                           |                                                              |                                                                             | duration of disease, baseline A1c                                                                                                                 | levels of A1c                                              |      |
| Sarkar et al., 2010 USA $\omega$ (11)    | Cross-sectional | 14,357 patients with T2DM recruited from Kaiser Permanente Northern California [Mean age (SD): 58 (10); 49% females; Race: 17% African American, 22% non-Hispanic white, 18% Latino, 23% Asian, & 20% other races]                                                                                                                                                                                                                | 3-brief* SQs (problem learning, needing help reading, not confident with forms)<br>[Functional HL] | Patient reported frequency of significant hypoglycemia       | Logistic regression                                                         | Age, sex, race, English proficiency, medication type, diabetes duration, A1c, glomerular filtration rate, income, dementia, and history of stroke | HL was associated with significant hypoglycemia            | Good |
| Sarkar et al., 2010 USA $\omega$ (33)    | Cross-sectional | 14,102 patients with T1DM or T2DM from Kaiser Permanente Northern California [Mean age: 59; 49% females; Race: 21% African-American, 28% non-Hispanic white, 14% Latino, 9% Asian, 12% Filipino, & 17% other races; Education: 10% no degree, 30% high school, 27% some college, & 33% college grad/post grad]                                                                                                                    | 3-brief* SQs (problem learning, needing help reading, not confident with forms)<br>[Functional HL] | Use of internet portal                                       | Logistic regression                                                         | Age, sex, race, educational attainment, income                                                                                                    | HL was associated with the use of the internet portal      | Good |
| Schillinger et al., 2002 USA $\psi$ (10) | Cross-sectional | 408 patients with T2DM recruited from two primary care clinics at a US public hospital [Mean age (SD): 58.1 (11.4); 58% females; Race: 18% Asian, 25% Black, 42% Latino; & 15% White; Education: 46% $\leq$ high school, 23% = high school, 28% some college &/or technical school, & 3% had a graduate degree]                                                                                                                   | s-TOFHLA Continuous<br>[Functional HL]                                                             | Glycemic control (A1c), self-reported diabetes complications | Multiple linear regression, logistic regression                             | Age, sex, race, education, language, insurance, social support, depression, treatment regimen, diabetes duration, diabetes education              | HL was associated with A1c and self-reported complications | Good |
| Schillinger et al., 2003 USA $\psi$ (51) | Cross-sectional | 61 patients with T2DM recruited from two primary care clinics at a US public hospital [Age: 55.7% $\geq$ 65 years 44.3% < 65 years; 49% females; Race: 55.7% African American & 44.3% non-African American]                                                                                                                                                                                                                       | s-TOFHLA Categorical (2 levels: inadequate vs. marginal)<br>[Functional HL]                        | Glycemic control (A1c)                                       | Logistic regression (using data for patients with low and marginal HL only) | Age, sex, race, diabetes duration, insulin use, number of new concepts conveyed                                                                   | HL was associated with glycemic control                    | Good |

|                                          |                 |                                                                                                                                                                                                                                                                                                          |                                                                                              |                                                            |                                                                                                 |                                                                                                                                                                      |                                                                                                                                       |           |
|------------------------------------------|-----------------|----------------------------------------------------------------------------------------------------------------------------------------------------------------------------------------------------------------------------------------------------------------------------------------------------------|----------------------------------------------------------------------------------------------|------------------------------------------------------------|-------------------------------------------------------------------------------------------------|----------------------------------------------------------------------------------------------------------------------------------------------------------------------|---------------------------------------------------------------------------------------------------------------------------------------|-----------|
| Schillinger et al., 2004 USA $\psi$ (52) | Cross-sectional | 408 patients with T2DM recruited from two primary care clinics at a US public hospital [Mean age: 58.1; 58% females; Race: 18% Asian, 25% Black, 42% Latino; & 15% White; Education: 46% $\leq$ high school, 23% = high school, 28% some college &/or technical school, & 3% had a graduate degree]      | s-TOFHLA<br>Categorical (3 levels: inadequate, marginal, adequate)<br>[Functional HL]        | Quality of physician-patient communication (IPC)           | Logistic regression (one model for people with inadequate HL & one for people with adequate HL) | Age, sex, race, education, language, insurance, treatment regimen, A1c, depression score, diabetes duration, Spanish fluency, length of time in the physician's care | HL was associated with explanatory/participatory dimensions of patient-physician communication, but not with the listening dimensions | Good      |
| Schillinger et al., 2006 USA $\psi$ (53) | Cross-sectional | 395 patients with T2DM recruited from two primary care clinics at a US public hospital [Mean age (SD): 57.9(11.4); Race: 18.5% Asian/Pacific Islander, 25.3% black, 42.3% Hispanic, & 13.9% white; Education: 46.8% $\leq$ high school, 24.1% = high school, & 29.1% some college &/or technical school] | s-TOFHLA<br>Continuous<br>[Functional HL]                                                    | Glycemic control (A1c)                                     | SEM                                                                                             | Age, race, educational level, primary language, insurance status                                                                                                     | HL was associated with A1c                                                                                                            | Good      |
| Tang et al., 2007 China (17)             | Cross-sectional | 149 patients with T2DM recruited from a diabetes education management centre of a public hospital [Mean Age (range): 59.8 (27-90); 45.6% females; Education: 55.8% $\leq$ primary education, 39.6%: secondary education, & 4.7% $\geq$ college education]                                                | s-TOFHLA<br>Continuous<br>[Functional HL]                                                    | Glycemic control (A1c)                                     | Spearman correlation<br>Multiple linear regression                                              | Sex, insurance status, duration of diabetes, patient awareness score, C-SDSCA score                                                                                  | HL was associated with A1c                                                                                                            | Good      |
| Thabit et al., 2009 Ireland (54)         | Cross-sectional | 100 patients with T2DM recruited from diabetes outpatient service [Immigrant patients: Mean age (SD): 45.8(11.8); Irish patients: Mean age (SD): 60.1(11)]                                                                                                                                               | REALM<br>Continuous<br>[Functional HL]                                                       | Glycemic control (A1c)                                     | Pairwise correlation (N=50)                                                                     | None                                                                                                                                                                 | HL was associated with A1c                                                                                                            | Fair-good |
| Wallace et al., 2010 USA (30)            | Cross-sectional | 208 patients with T2DM recruited from a diabetes management program at an internal medicine practice [Mean age (range): 58 (23-85); 64% females; Race: 48% African American; Education: 34% < high school]                                                                                               | s-TOFHLA<br>Categorical (2 levels: Adequate vs. inadequate), & continuous<br>[Functional HL] | Self-management support (PACIC)                            | Pearson correlation<br>Multiple linear regression                                               | Sex, race, duration of diabetes                                                                                                                                      | HL was associated with self management support                                                                                        | Good      |
| Williams et al., 1998 USA (26)           | Cross-sectional | 114 patients with T1DM or T2DM recruited from 2 urban public hospitals [Inadequate HL group: Mean age (SD): 57.4(9.3); 76% females; Race: 18% black, 2% white, 80% Latino; Years of schooling: 78% $\leq$ 6 years, 16% 7-11 years, 4% 12 years, & 2% > high school; Marginal HL                          | TOFHLA<br>Categorical (3 levels: inadequate, marginal, adequate)                             | Glycemic control (A1c), blood pressure, diabetes knowledge | Multiple linear regression, Chi-square test                                                     | None                                                                                                                                                                 | HL was associated with diabetes knowledge, but not with A1c or blood pressure                                                         | Good      |

---

group: Mean age (SD): 53.2(8.8); 69% females; [Functional HL]  
Race: 31% black, 69% Latino; Years of  
schooling: 39% ≤ 6 years, 39% 7-11 years, 15%  
12 years, & 8% > high school; Adequate HL  
group: Mean age (SD): 49.2(10.3); 67%  
females; Race: 37% black, 33% white, 29%  
Latino; Years of schooling: 2% ≤ 6 years, 29% 7-  
11 years, 37% 12 years, & 31% > high school]

---

† Variables used in multivariate analysis, or adjusted for in bivariate analysis; if both analyses were performed, the reported variables are the ones included in multivariate analysis.

‡ Adjusted analyses results are reported. In case adjustment was not performed, un-adjusted analyses findings are reported. If both bivariate and multivariate analysis were done; findings based on

multivariate analysis were reported.

Ψ, ψ, ω Indicates that the identified record is one of multiple publications of the same study; publications that have the same symbol are from the same study.

\* Each question is analyzed separately as a categorical variable (2 levels).

\*\* Each subscales is analyzed separately as a categorical variable (2 levels).

\*\*\* Self-care was assessed by asking “overall, what grade would you give yourself on your diabetes self-care in the past 6 months?”; response categories ranges from 1 to 9.

SD: Standard Deviation; OR: Odds Ratio; IQR: Interquartile range; SEM: Structural Equation Modeling; T1DM: Type 1 Diabetes Mellitus; T2DM: Type 2 Diabetes Mellitus; HL: Health Literacy; NR: Not Reported; BMQ: Beliefs about Medications Questionnaire; C-SDSCA: Chinese – Summary of Diabetes Self Care Activities; CESD-10: Center for Epidemiologic Studies Depression Scale-10; DBP: Diastolic Blood Pressure; DFS: Diabetes Fatalism Scale; DHBM: Diabetes Health Belief Model; DKQ: Diabetes Knowledge Questionnaire; DKT: Diabetes Knowledge Test; DMSES: Diabetes Management Self-Efficacy Scale; DPMD: Desire to Participate in Medical Decision making; DSHLM: Diabetes specific health literacy measure; FPI: Facilitation of Patient Involvement; HCR: Health Care Relationship Trust Scale; HDL: High Density Lipoprotein; IPC: Interpersonal Processes of Care in Diverse Populations Questionnaire; KDQ: Knowledge Diabetes Questionnaire; LDL: Low Density Lipoprotein; MOS: Medical Outcomes Study; PACIC: Patient Assessment of Chronic Illness Care; PFI: Facilitation of Patient Involvement scale; REALM-R: Rapid Estimate of Adult Literacy in Medicine- Revised; RIAS: Roter Interaction Analysis System; s-TOFHLA: Test of Functional Health Literacy in Adults – Short form; 3-brief SQs: 3 brief screening questions; SBP: Systolic Blood Pressure; SCQ: Self-administered Comorbidity Questionnaire; SDSCA: Summary of Diabetes Self Care Activities; SKILLD: Spoken Knowledge in Low Literacy in Diabetes Scale; SMBG: Self-Monitoring of Blood Glucose; TIBI: Total Illness Burden Index; WFPTS: Wake Forest Physician Trust Scale; TOFHLA: Test of Functional Health Literacy in Adults

## Appendix 2: Overview of Health Literacy and Numeracy Studies

| Author(s), year Source          | Design          | Participants' characteristics N, diabetes type, recruitment site [age, sex, race, educational level]                                                                                                                                   | Numeracy assessment                                 | HL measure (levels) / [domain addressed]                                                           | Outcomes                                     | Type of analysis performed | Covariates†:                                                                             | Main findings‡                                                                                          | Quality Rating |
|---------------------------------|-----------------|----------------------------------------------------------------------------------------------------------------------------------------------------------------------------------------------------------------------------------------|-----------------------------------------------------|----------------------------------------------------------------------------------------------------|----------------------------------------------|----------------------------|------------------------------------------------------------------------------------------|---------------------------------------------------------------------------------------------------------|----------------|
| Cavanaugh et al., 2008 USA (38) | Cross-sectional | 398 patients with T1DM or T2DM recruited from 2 primary care and 2 diabetes clinics at 3 medical centers [Median age (IQR): 55 (46-64); 51% females; Race: 63% White & 37% nonwhite; Education: 43% ≤ high school & 57% > high school] | DNT (Continuous)<br>WRAT-3R (Categorical: 2 levels) | REALM<br>Categorical (2 levels: high vs. low)<br>[Functional HL]                                   | Glycemic control (A1c)                       | Multiple linear regression | Age, sex, race, annual income, type of diabetes, diabetes duration, clinic site          | Diabetes numeracy was associated with A1c; HL was not associated with A1c                               | Good           |
| Mayberry et al., 2011 USA (34)  | Cross-sectional | 75 patients with T2DM recruited from a primary care clinic at an academic medical center [Mean age (SD): 56.9 (8.8); 68% females; Race: 65% white & 35% non-white]                                                                     | SNS                                                 | 3-brief* SQs (problem learning, needing help reading, not confident with forms)<br>[Functional HL] | Use of computer and patient web portal (PWP) | Spearman correlation       | None                                                                                     | HL was associated with computer use but not with PWP, and numeracy was not associated with either       | Fair-good      |
| Osborn et al., 2009 USA Ψ (19)  | Cross-sectional | 383 patients with T2DM recruited from primary care clinics at 3 medical centers [Median age (IQR): 56(47-64); 50% females; Race: 65% white, & 35% nonwhite; Education: 43% < high school & 57% ≥ high school]                          | DNT (Continuous)<br>WRAT-3 (Continuous)             | REALM-R<br>Continuous<br>[Functional HL]                                                           | Glycemic control (A1c)                       | SEM                        | Age, sex, race, educational level, income, diabetes type, diabetes duration, insulin use | Diabetes-related numeracy was associated with A1c, HL and general numeracy were not associated with A1c | Good           |
| Osborn et al., 2010 USA Ψ (27)  | Cross-sectional | 383 patients with T1DM or T2DM recruited from 2 primary care clinics and 2 diabetes clinics at 3                                                                                                                                       | WRAT-3R (Continuous)                                | REALM-R<br>Continuous<br>[Functional HL]                                                           | Glycemic control (A1c), self-                | SEM                        | Age, sex, race, educational                                                              | Numeracy, but not HL, was directly                                                                      | Good           |



|                             |                 |                                                                                                                                                                                                                            |                                            |                                                                                 |                                                                   |                      |                                                              |                                                                   |      |
|-----------------------------|-----------------|----------------------------------------------------------------------------------------------------------------------------------------------------------------------------------------------------------------------------|--------------------------------------------|---------------------------------------------------------------------------------|-------------------------------------------------------------------|----------------------|--------------------------------------------------------------|-------------------------------------------------------------------|------|
|                             |                 | medical centers [Mean age (SD): 54.4(13); 50% females; Race: 65% white, & 35% nonwhite; Education: 8% < 9 <sup>th</sup> grade, 35% 10 <sup>th</sup> grade-high school, 57% > high school]                                  |                                            | HL]                                                                             | efficacy (PDSMS)                                                  |                      | level, income, diabetes type, diabetes duration, insulin use | associated with self efficacy and indirectly associated with A1c  |      |
| White et al., 2011 USA (40) | Cross-sectional | 144 patients with T1DM or T2DM recruited from two primary care clinics [Mean age (SD): 47.8 (12.1); 62% females; Education: 56% < high school, 17%: some high school, 18%: high school graduate, 9%: some college or more] | DNT-15 (continuous)<br>WRAT-4 (continuous) | s-TOFHLA Categorical (3 levels: inadequate, marginal, adequate) [Functional HL] | Glycemic control (A1c), self-efficacy (PDSMS), self-care (SDSCA), | Spearman correlation | None                                                         | Numeracy was not associated with A1c, self-care, or self-efficacy | Good |

\* Variables used in multivariate analysis, or adjusted for in bivariate analysis; if both analyses were performed, the reported variables are the ones included in multivariate analysis.

† Adjusted analyses results are reported. In case adjustment was not performed, un-adjusted analyses findings are reported. If both bivariate and multivariate analysis were done; findings based on multivariate analysis were reported.

Ψ, ψ, ω Indicates that the identified record is one of multiple publications of the same study; publications that have the same symbol are from the same study.

SD: Standard Deviation; IQR: interquartile range; T1DM: Type 1 Diabetes Mellitus; T2DM: Type 2 Diabetes Mellitus; HL: Health Literacy; DKT: Diabetes Knowledge Test; DNT: Diabetes Numeracy Test; PDSS/PDSMS: Perceived Diabetes Self-Management Scale; REALM: Rapid Estimate of Adult Literacy in Medicine; s-TOFHLA: Test of Functional Health Literacy in Adults – Short form; 3-brief SQs: 3 brief screening questions; SDSCA: Summary of Diabetes Self Care Activities; WRAT: Wide Range Achievement; SNS: Subjective Numeracy Scale; NR: Not Reported
